# Supplementary material
Source: MDPI journal article supplement (https://www.mdpi.com/2227-9040/10/1/6)
Supplement: s1 [file s1]

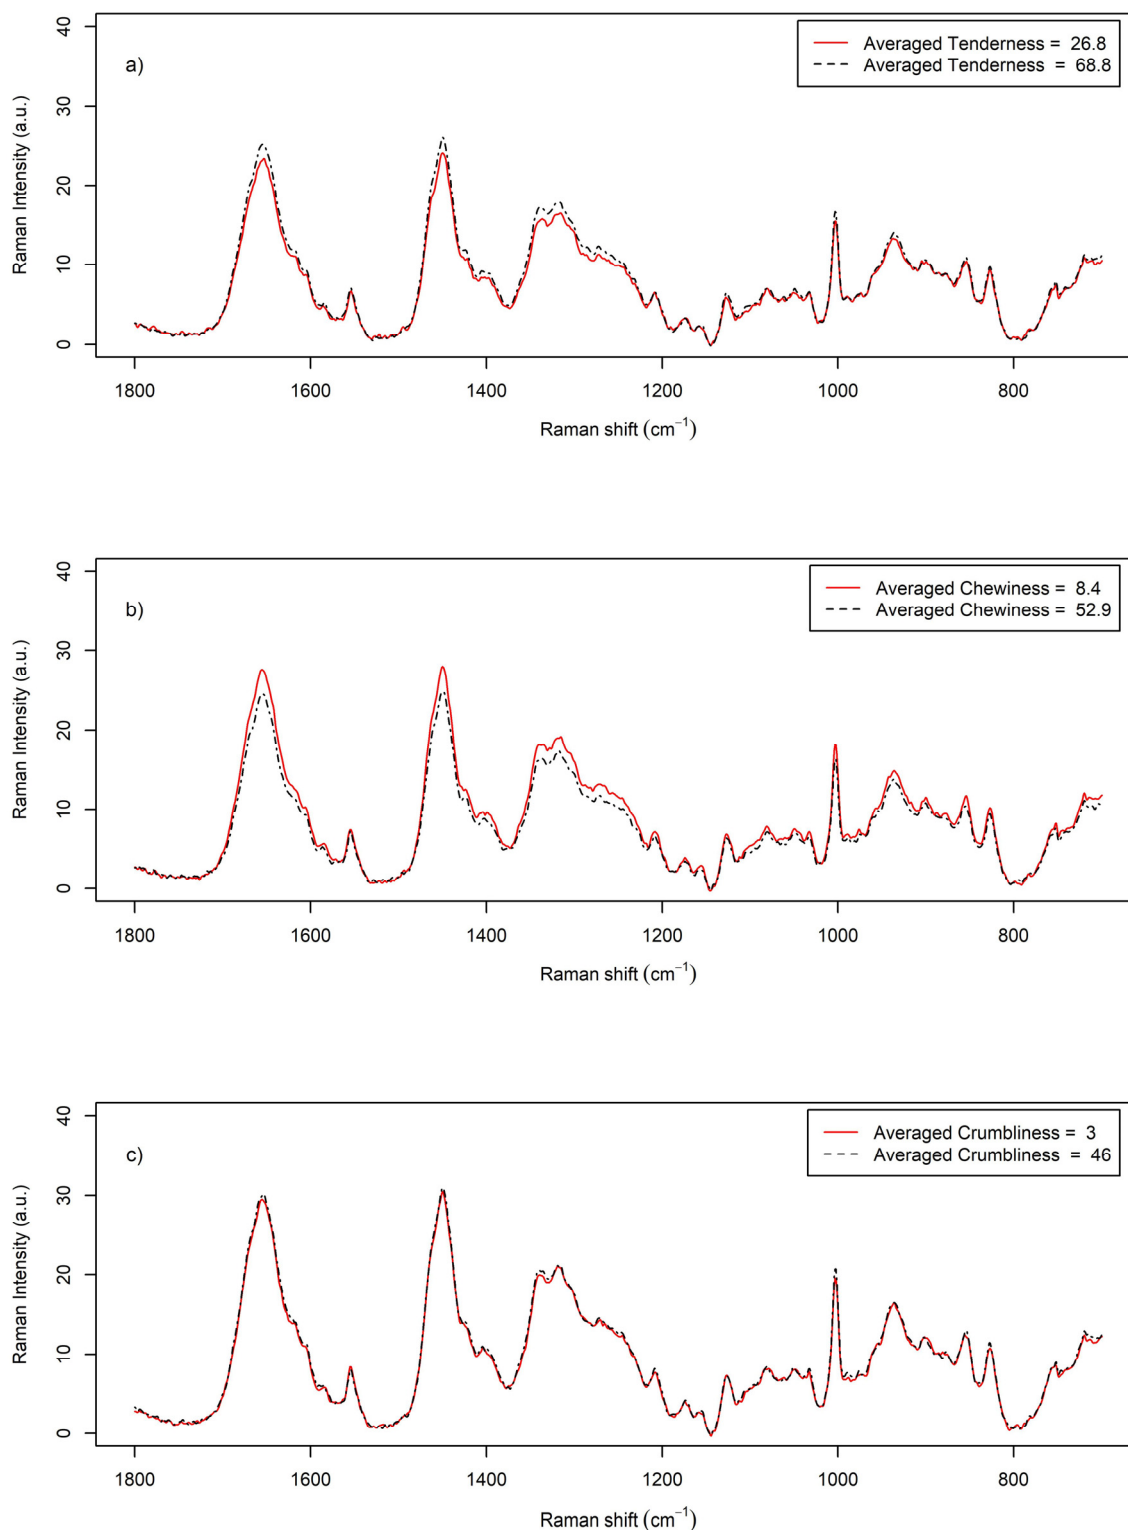

Figure S1: Average spectra for five highest and lowest scoring samples for each of three sensory traits (a) tenderness, (b) chewiness and (c) crumbliness. Less favourable profiles in red and more favourable profiles in dashed blue for tenderness and crumbliness, while for chewiness, less favourable profiles are in dashed blue and more favourable profiles are in red.
